# Supplementary material
Source: publisher site journal article supplement (https://www.dovepress.com/article/420836)
Supplement: Supplementary file 1 [file get_supplementary_file.php]

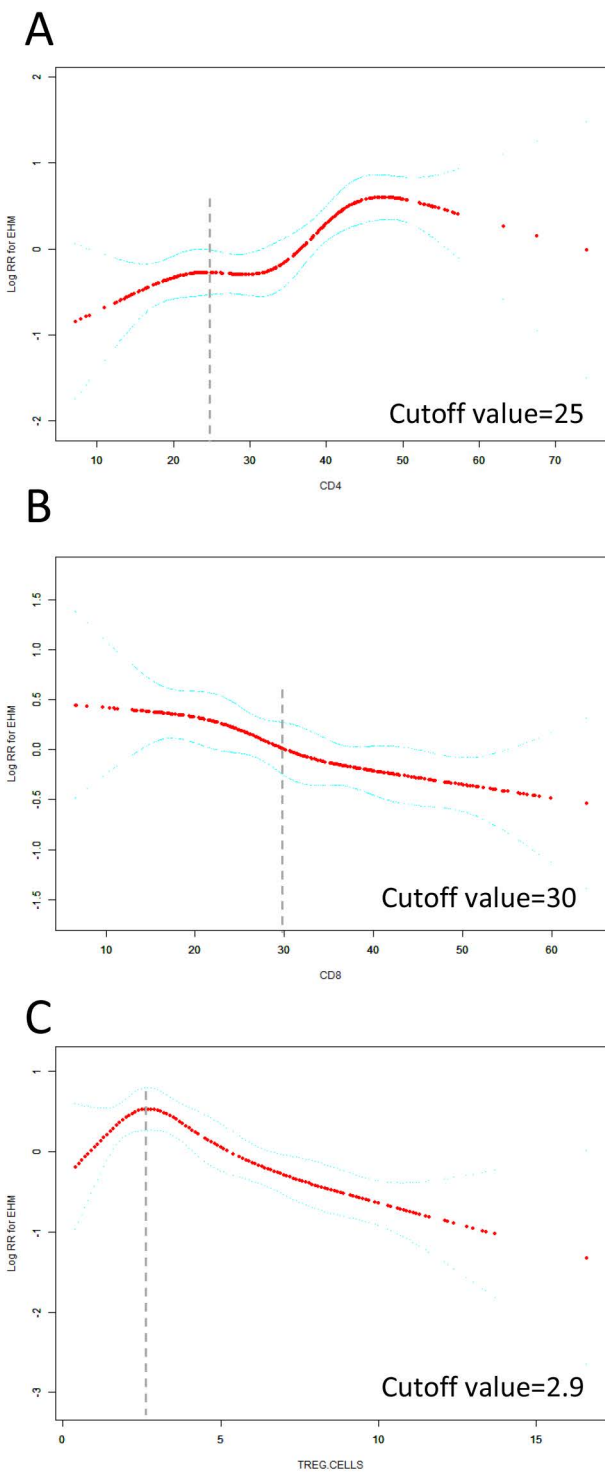

Fig. S1. (A) Calculating the best cut-off value of CD4+ using a spline smoothing plot.

(B) Calculating the best cut-off value of CD8+

using a spline smoothing plot. (C) Calculating the best cut-off value of

Treg cells using a spline smoothing plot.

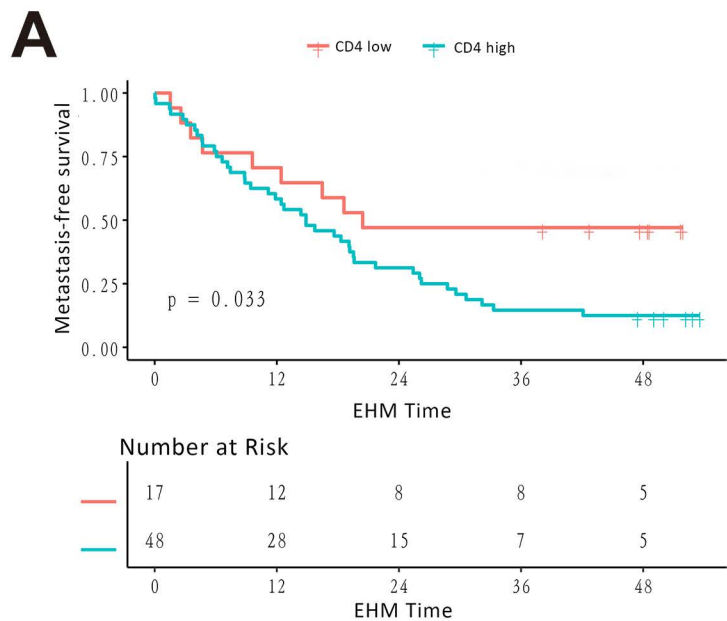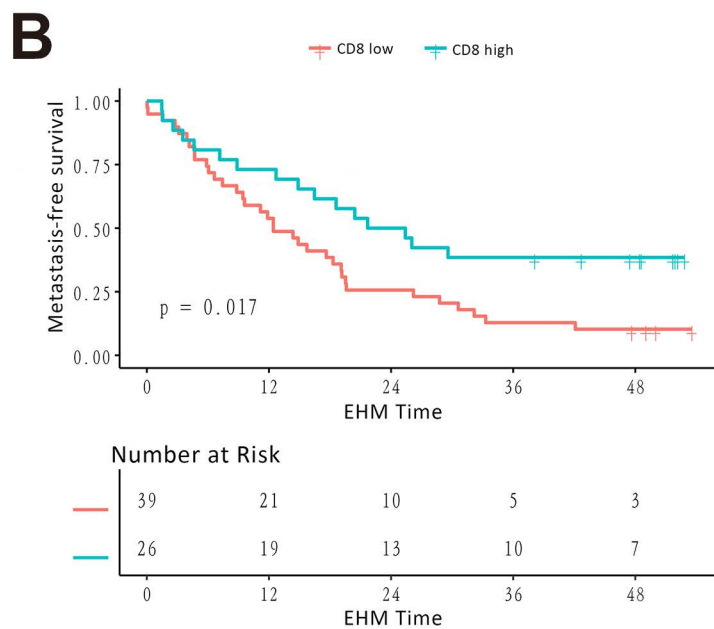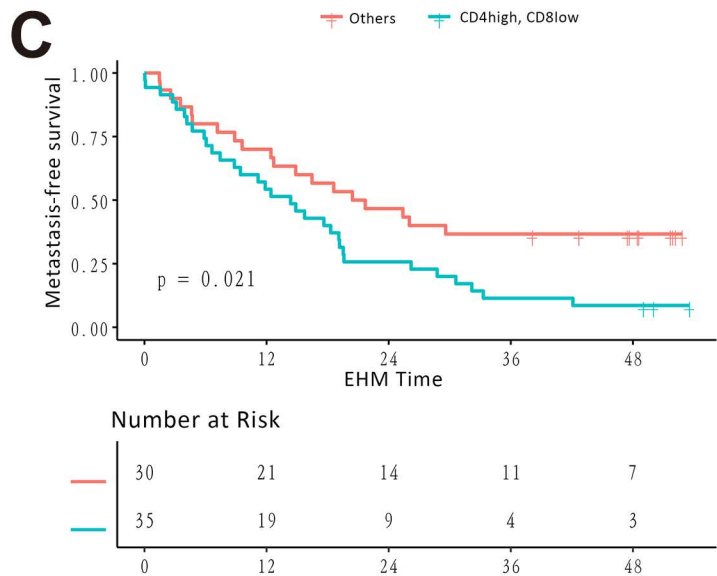

Fig. S2 Kaplan-Meier analyses for MFS according to CD4+ cell ratio (A), CD8+ cell ratio (B), and combined (CD4+/CD8+) cell ratio (C) in the validation cohort.

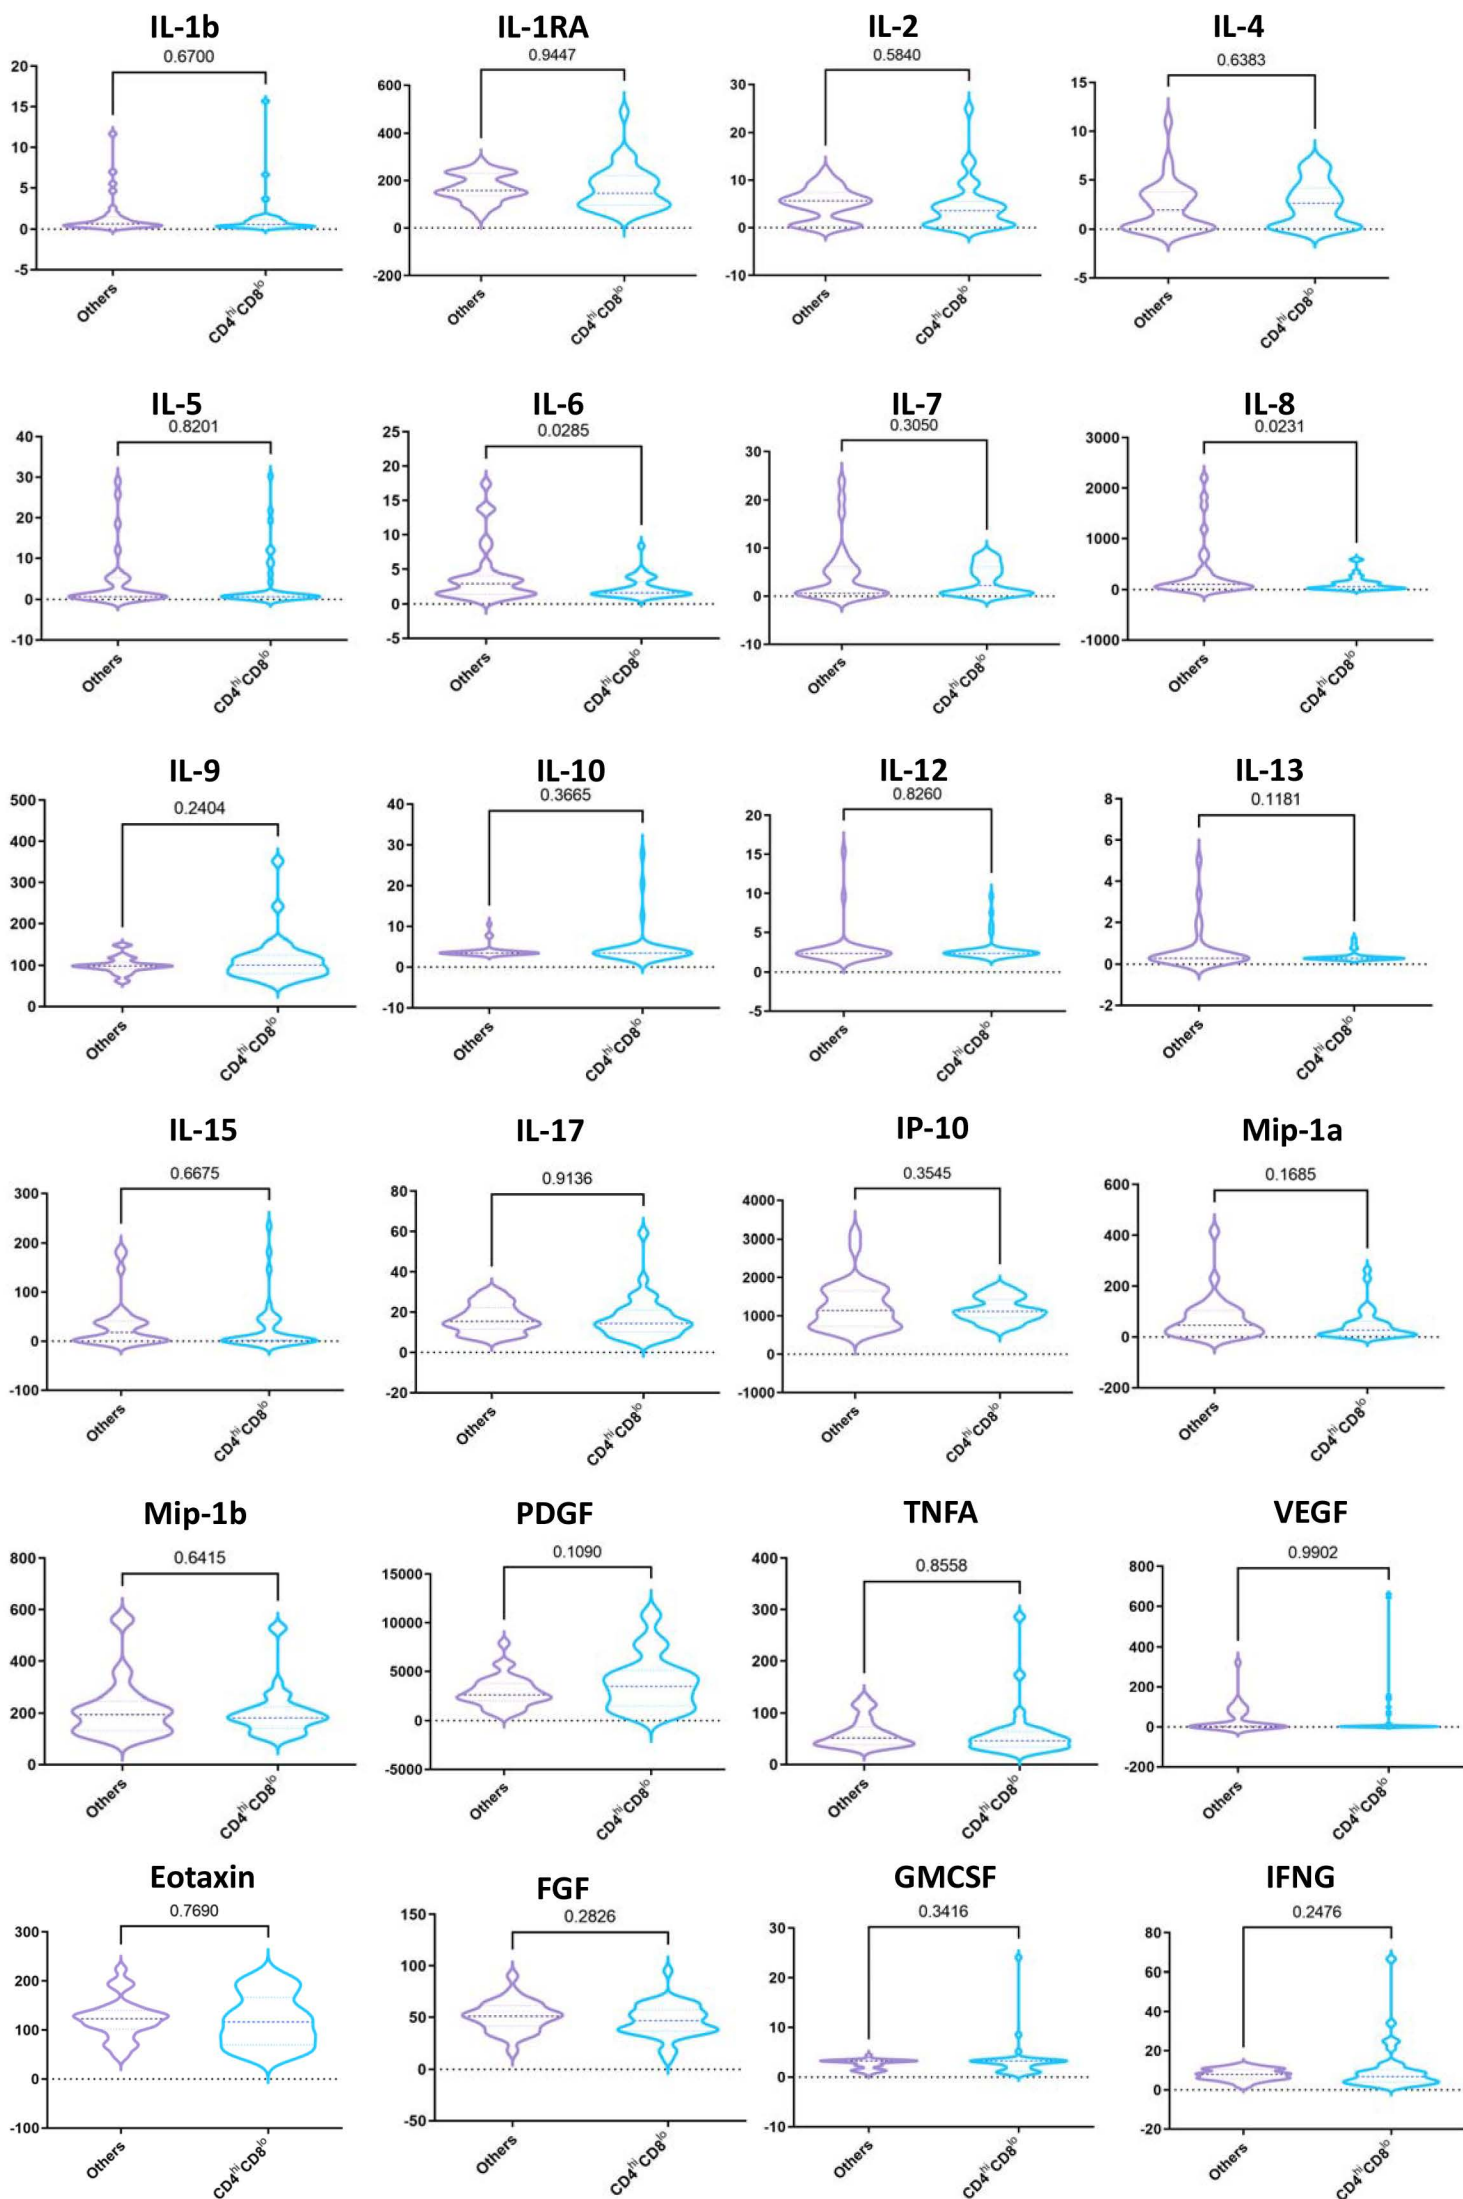

Fig. S3. Difference in 24 serum cytokine levels between HCC patients with the CD4<sup>high</sup>/CD8<sup>low</sup> phenotype and other pooled patients.

**A**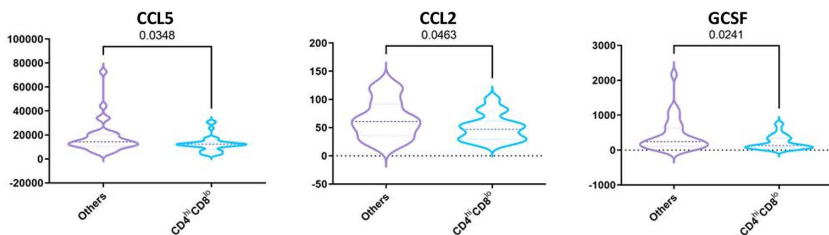**B**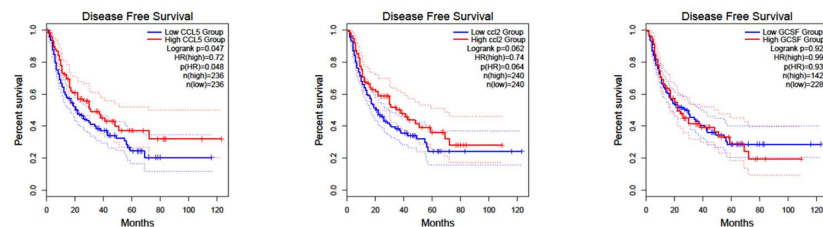**C**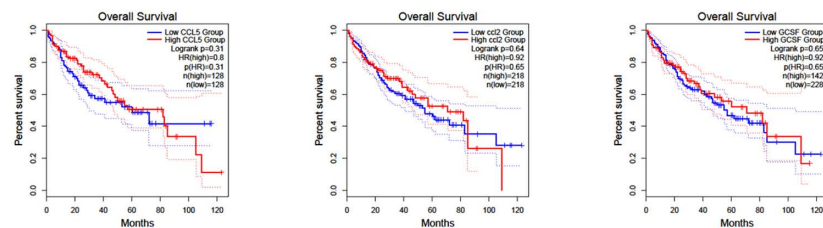**D**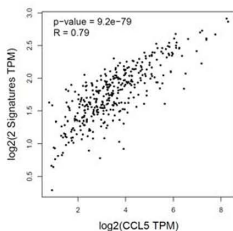

Fig. S4 CCL5 affects DFS for HCC patients.

(A) Differences in CCL5, CCL2, and GCSF levels in HCC patients with different systemic immune states.

(B, C) The prognosis value of CCL5, CCL2, and GCSF expression levels.

Patients were divided into 2 groups according to the values of CCL5, CCL2, and GCSF expression. Overall survival (OS) and disease-free survival (DFS) were calculated using the Kaplan-Meier method.

(D) Correlation analysis between CCL5 ( $R = 0.79$ ), CCL2 ( $R = 0.52$ ), and T-lymphocyte gene signatures (CD4/CD8) using the Spearman method.

Table S1. Patient characteristics in non- and EHM population of primary cohort.

| Characteristic   | Non-EHM<br>(N=135) | EHM<br>(N=180) | <i>p</i> -value |
|------------------|--------------------|----------------|-----------------|
| AGE              | 58.6 ± 10.5        | 58.9 ± 10.4    | 0.678           |
| SEX              |                    |                | 0.068           |
| Male             | 98 (72.6%)         | 151 (83.9%)    |                 |
| Female           | 37 (27.4%)         | 29 (16.1%)     |                 |
| Hepatitis        |                    |                | 0.901           |
| None             | 15 (11.1%)         | 19 (10.6%)     |                 |
| HBV              | 100 (74.1%)        | 135 (75.0%)    |                 |
| HCV              | 17 (12.6%)         | 19 (10.6%)     |                 |
| HBV&HCV          | 1 (0.7%)           | 3 (1.7%)       |                 |
| Others           | 2 (1.5%)           | 4 (2.2%)       |                 |
| Tumor Number     | 1.4 ± 0.8          | 1.9 ± 1.6      | <b>0.002*</b>   |
| Tumor size       | 2.7 ± 1.2          | 2.8 ± 1.5      | 0.727           |
| AFP              | 173.5 ± 622.1      | 312.3 ± 2047.9 | 0.264           |
| HB               | 135.9 ± 17.5       | 133.2 ± 19.7   | 0.260           |
| PLTs             | 132.6 ± 59.4       | 126.0 ± 59.4   | 0.385           |
| Prothrombin      | 14.4 ± 3.4         | 14.2 ± 1.1     | 0.619           |
| Albumin          | 40.7 ± 4.5         | 39.7 ± 4.3     | 0.073           |
| WBC              | 4.8 ± 1.7          | 4.6 ± 1.6      | 0.347           |
| Lymphocytes      | 0.3 ± 0.1          | 0.3 ± 0.1      | 0.211           |
| Neutrophiles     | 0.6 ± 0.1          | 0.6 ± 0.1      | 0.232           |
| BCLC.Staging     |                    |                | <b>0.015*</b>   |
| A                | 121 (89.6%)        | 143 (79.4%)    |                 |
| B                | 14 (10.4%)         | 37 (20.6%)     |                 |
| Child-Pugh Grade |                    |                | 0.321           |
| A                | 135 (100.0%)       | 177 (98.3%)    |                 |
| B                | 0 (0.0%)           | 1 (0.6%)       |                 |
| C                | 0 (0.0%)           | 2 (1.1%)       |                 |

The bold value indicated identifying significant patient characteristics with baseline differences between two groups. \*:  $P < 0.05$ .

Table S2. Patient characteristics in non- and EHM population of validation cohort.

| Characteristic   | Non-EHM<br>(N=14) | EHM<br>(N=51)   | <i>p</i> -value |
|------------------|-------------------|-----------------|-----------------|
| AGE              | 55.9 ± 7.1        | 60.5 ± 10.1     | 0.063           |
| SEX              |                   |                 | 0.365           |
| Male             | 10 (71.4%)        | 42 (82.4%)      |                 |
| Female           | 4 (28.6%)         | 9 (17.6%)       |                 |
| Hepatitis        |                   |                 | 0.539           |
| None             | 3 (21.4%)         | 10 (19.6%)      |                 |
| HBV              | 11 (78.6%)        | 34 (66.7%)      |                 |
| HCV              | 0 (0.0%)          | 4 (7.8%)        |                 |
| HBV&HCV          | 0 (0.0%)          | 3 (5.9%)        |                 |
| Others           | 2 (1.7%)          | 3 (2.0%)        |                 |
| Tumor.Number     | 1.2 ± 0.4         | 2.1 ± 1.6       | 0.072           |
| Tumor size       | 2.4 ± 1.0         | 2.8 ± 1.3       | 0.291           |
| AFP              | 391.3 ± 632.5     | 1159.0 ± 3938.2 | 0.474           |
| HBs              | 137.0 ± 13.9      | 134.2 ± 17.4    | 0.602           |
| PLTs             | 128.4 ± 52.5      | 126.6 ± 52.0    | 0.918           |
| Prothrombin      | 14.3 ± 0.7        | 14.2 ± 1.0      | 0.741           |
| Albumin          | 40.8 ± 4.1        | 39.3 ± 4.8      | 0.313           |
| WBC              | 5.2 ± 2.3         | 4.9 ± 1.7       | 0.688           |
| Lymphocytes      | 0.3 ± 0.1         | 0.3 ± 0.1       | 0.171           |
| Neutrophiles     | 0.6 ± 0.1         | 0.6 ± 0.1       | 0.354           |
| BCLC.Staging     |                   |                 | <b>0.035*</b>   |
| A                | 14 (100.0%)       | 38 (74.5%)      |                 |
| B                | 0 (0.0%)          | 13 (25.5%)      |                 |
| Child-Pugh Grade |                   |                 | 0.320           |
| A                | 13 (92.9%)        | 50 (98.0%)      |                 |
| B                | 1 (7.1%)          | 1 (2.0%)        |                 |

The bold value indicated identifying significant patient characteristics with baseline differences between two groups. \*:  $P < 0.05$ .

Table S3. Tumor extrahepatic metastasis rate at 1-yr, 3-yr, 5-yr, 7-yr and 10-yr after thermal ablation

| Groups                    |      |                                         | 1-years<br>MFS | 3-years<br>MFS | 5-years<br>MFS | 7-years<br>MFS | 10-years<br>MFS | HR, 95%CI    | <i>p</i>         | Median (months) |
|---------------------------|------|-----------------------------------------|----------------|----------------|----------------|----------------|-----------------|--------------|------------------|-----------------|
| CD4 <sup>+</sup><br>ratio | cell | CD4 <sup>high</sup> (>25)               | 69%            | 51%            | 39%            | 31%            | 21%             | 1.7(1.2-2.3) | <i>p</i> =0.0019 | 38.4            |
|                           |      | CD4 <sup>low</sup> (≤25)                | 80%            | 67%            | 57%            | 50%            | 39%             |              |                  | 85.7            |
| CD8 <sup>+</sup><br>ratio | cell | CD8 <sup>high</sup> (>30)               | 78%            | 64%            | 54%            | 47%            | 35%             | 0.6(0.4-0.8) | <i>p</i> <0.001  | 77.7            |
|                           |      | CD8 <sup>low</sup> (≤25)                | 65%            | 46%            | 34%            | 27%            | 16%             |              |                  | 28.8            |
| Combined                  |      | CD4 <sup>high</sup> /CD8 <sup>low</sup> | 63%            | 42%            | 30%            | 21%            | 12%             | 2.0(1.5-2.8) | <i>p</i> <0.001  | 26              |
|                           |      | Remaining patients                      | 80%            | 65%            | 55%            | 46%            | 35%             |              |                  | 77.7            |
